# Supplementary material for: System-wide hematopoietic and immune signaling aberrations in COVID-19 revealed by deep proteome and phosphoproteome analysis
Source: bioRxiv or medRxiv preprint supplement (doi:10.1101/2021.03.19.21253675), 2021-03-25
Supplement: Supplementary file [file media-1.pdf]

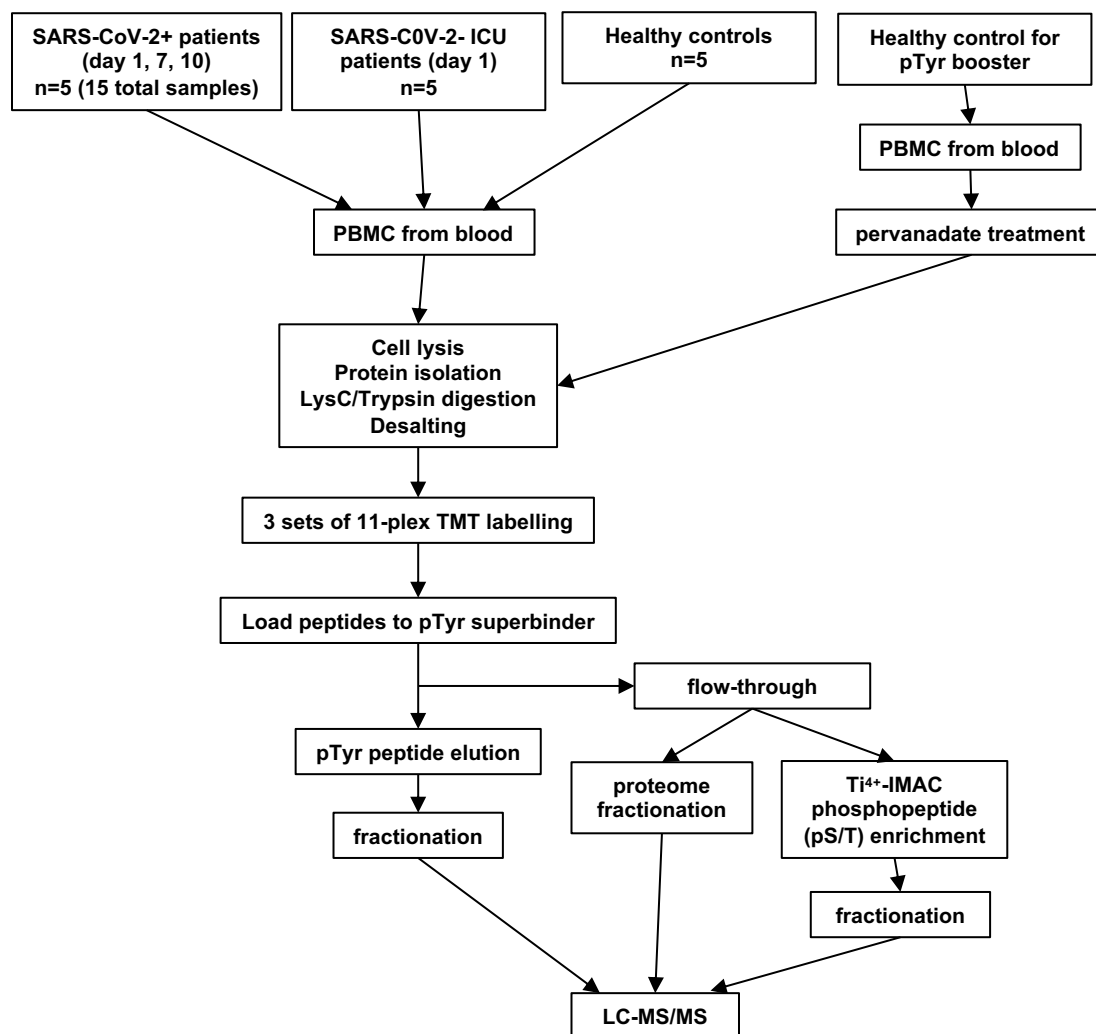

**Fig. S1. An overview of sample processing for LC/MS-MS analysis.**

PMBCs were isolated from patients or healthy control blood samples. Another PBMC sample was treated with pervanadate to be used as pTyr booster in the 11-plex TMT experiments. Protein materials were isolated and digested by LysC and trypsin. The samples were labelled with 3 sets of 11-plex TMT labelling reagents. The 11 peptide samples for each isobaric set were combined and incubated with SH2 superbinder beads. The bound peptides were enriched with tyrosine-phosphorylated peptides. The flow-through materials were used for analysis of the full proteome and the phosphoproteome (mainly for pSer and pThr peptides). The  $Ti^{4+}$ -IMAC resin was used for the phosphopeptide enrichment. Proteome and enriched phosphopeptides were fractionated using a high-pH fractionation kit prior to LC-MS/MS analysis.

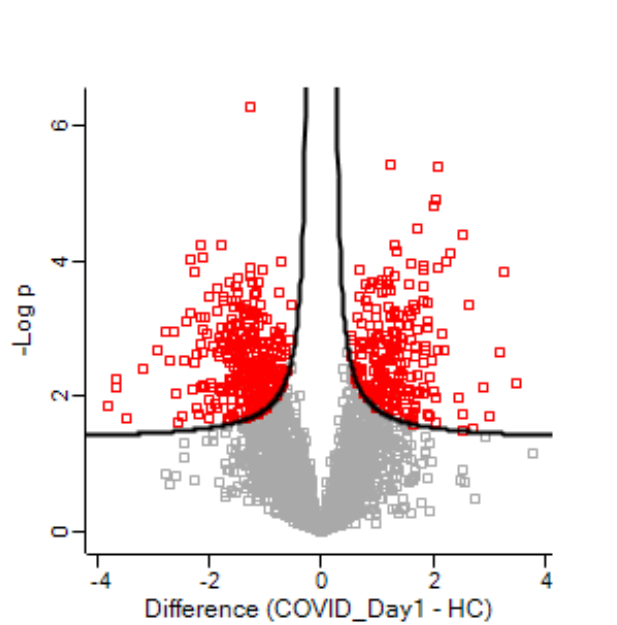

**Fig. S2. Proteins differentially expressed in COVID-19+ ICU patients compared to healthy controls.** A Volcano plot comparing the identified PBMC proteome between the COVID-19 patients (day 1 samples) and healthy controls. 521 proteins (marked red) were found significantly different between the two sample groups (FDR 5%).

A

| MCODE   | GO            | Description                                      | Log10(P) |
|---------|---------------|--------------------------------------------------|----------|
| MCODE_1 | GO:0044772    | mitotic cell cycle phase transition              | -8.7     |
| MCODE_1 | GO:0044770    | cell cycle phase transition                      | -8.3     |
| MCODE_1 | ko04340       | Hedgehog signaling pathway                       | -7.9     |
| MCODE_2 | R-HSA-8953854 | Metabolism of RNA                                | -10.6    |
| MCODE_2 | ko03040       | Spliceosome                                      | -9.4     |
| MCODE_2 | hsa03040      | Spliceosome                                      | -9.4     |
| MCODE_3 | GO:0034655    | nucleobase-containing compound catabolic process | -11.7    |
| MCODE_3 | GO:0046700    | heterocycle catabolic process                    | -11.3    |
| MCODE_3 | GO:0044270    | cellular nitrogen compound catabolic process     | -11.3    |
| MCODE_4 | GO:0045055    | regulated exocytosis                             | -8.6     |
| MCODE_4 | R-HSA-2262752 | Cellular responses to stress                     | -6.8     |
| MCODE_4 | R-HSA-8953897 | Cellular responses to external stimuli           | -6.8     |

B

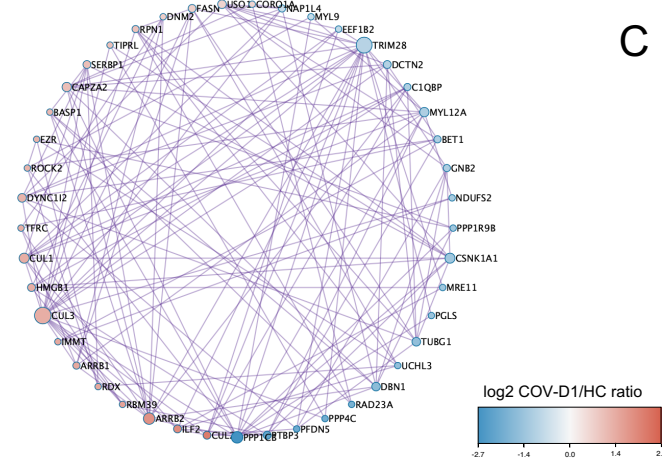

PPI network 1: Cell cycle phase transition;  
Hedgehog signaling pathway

C

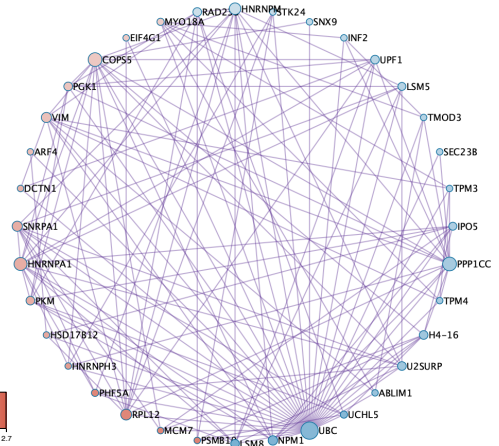

PPI network 2: Spliceosome; Metabolism of RNA

D

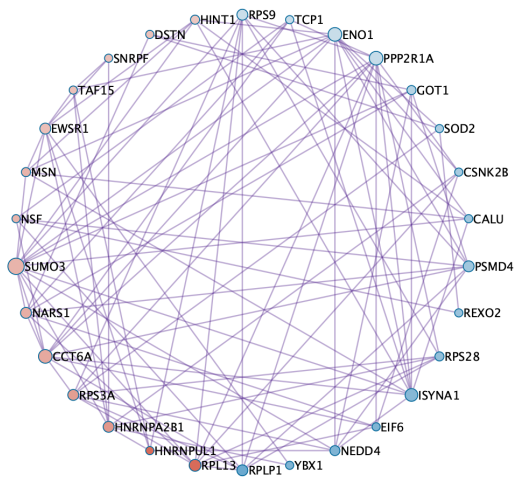

PPI network 3: Catabolic processes

E

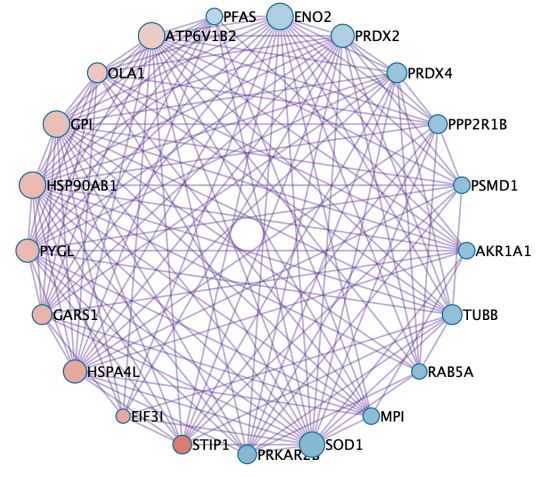

PPI network 4: Regulated Exocytosis;  
Responses to stress and external stimuli

**Fig. S3. PPI network clustering by Metascape on the differentially expressed proteins in the COVID-19 PBMCs.** (A) A summary of enriched networks and the associated top 3 functional annotation terms. MCODE\_1 to 4 correspond to the depicted PPI network 1-4 below. (B-E) PPI networks significantly enriched in the COVID-19 PMBCs. A color gradient from cyan to orange was used to indicate decreased to increased expression between the COV-D1 and HC groups with the dot size indicating Log<sub>2</sub> of the difference (from -2.7 to 2.5).

**A**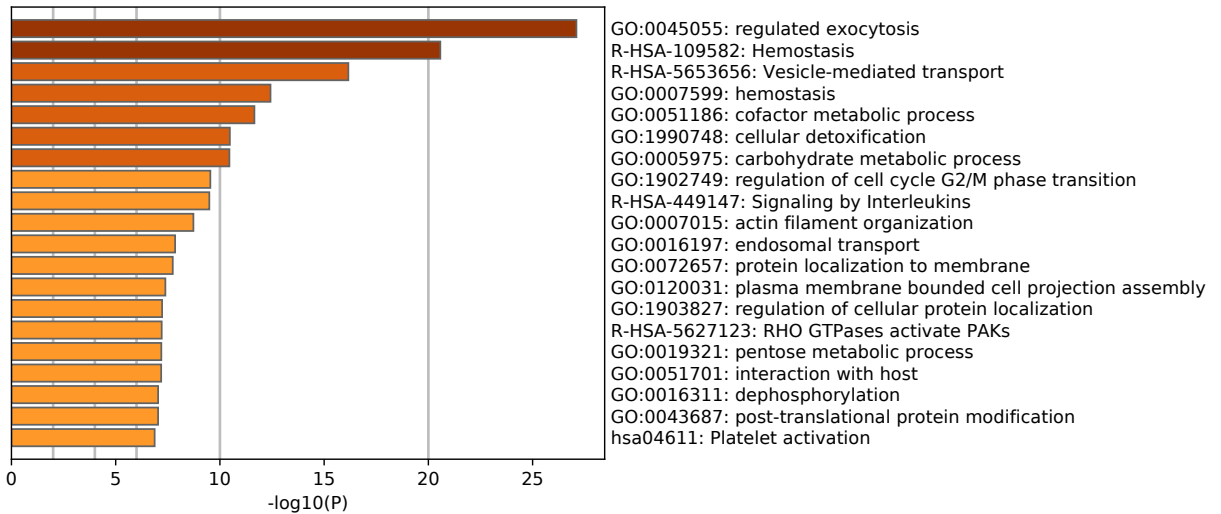**B**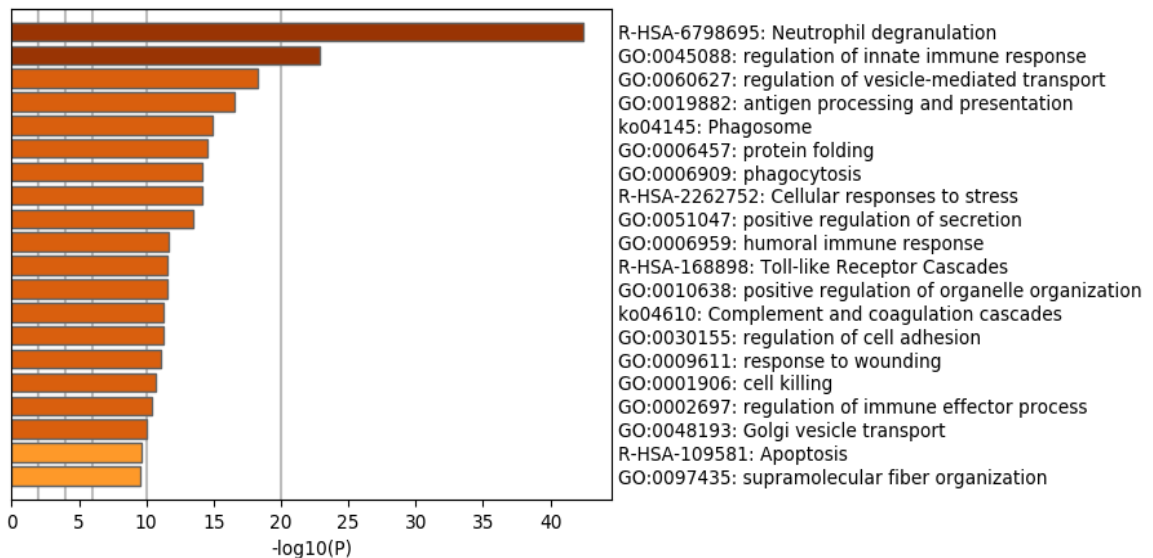

**Fig. S4. Gene Ontology (GO) enrichment analysis of proteins differentially expressed between patients and healthy controls. (A)** Enriched processes or functions for the Cluster 1 proteins (in Fig. 1A). **(B)** Enriched processes or functions for the Cluster 5 proteins (in Fig. 1A).

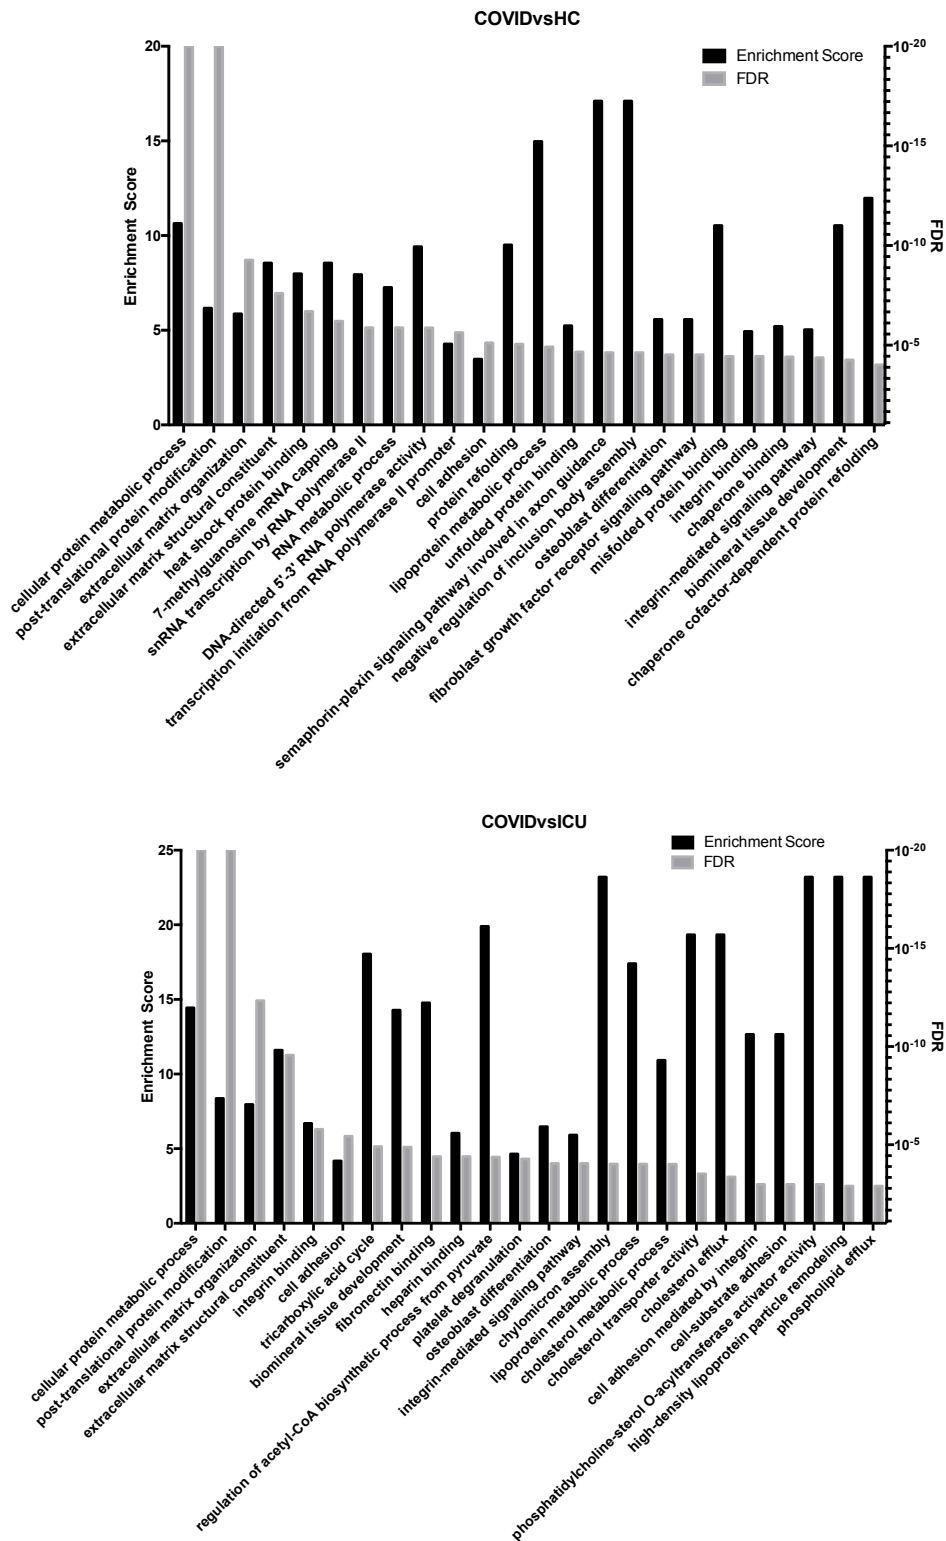

**Fig. S5. Distinguishing features of the COVID-19 PBMC phosphoproteome compared to that of the healthy controls or ICU patients.** Biological processes significantly enriched between (A) COVID-Day1 and HC, and, (B) COVID Day1 and ICU based on PHOTON analysis. The enrichment score and FDR (Benjamini-Hochberg)  $q$ -value from Fisher's exact test are shown on the y-axis.



A

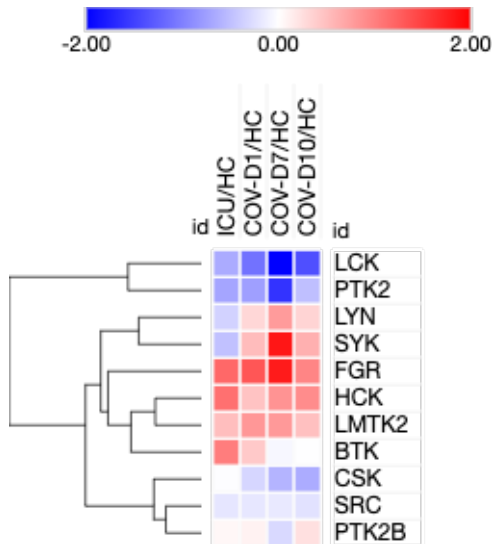

B

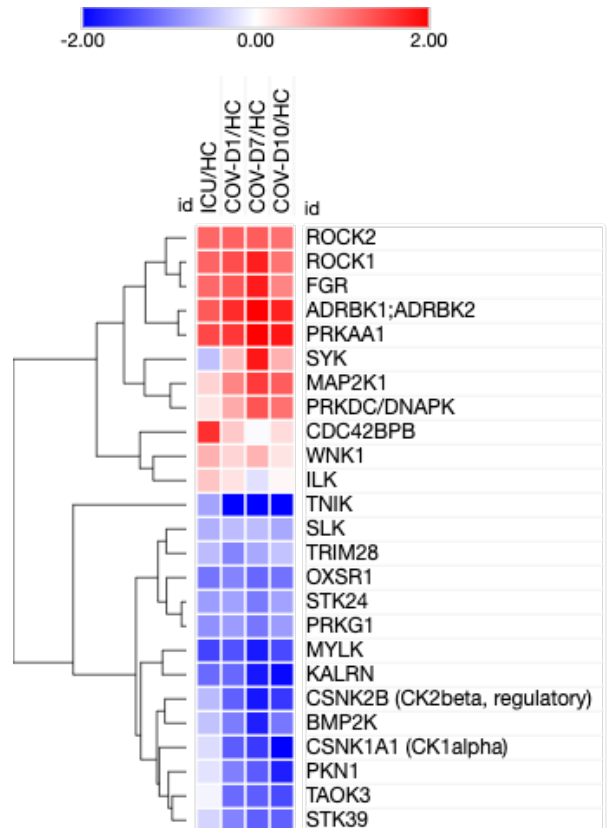

**Fig. S7. Kinase protein abundance in PBMC samples from patients relative to healthy controls.** The scale is in log<sub>2</sub> ratio between the sample groups. (A) All tyrosine kinases. (B) All kinases with ANOVA FDR < 10% between the three groups (COV-D1, ICU, HC).

A

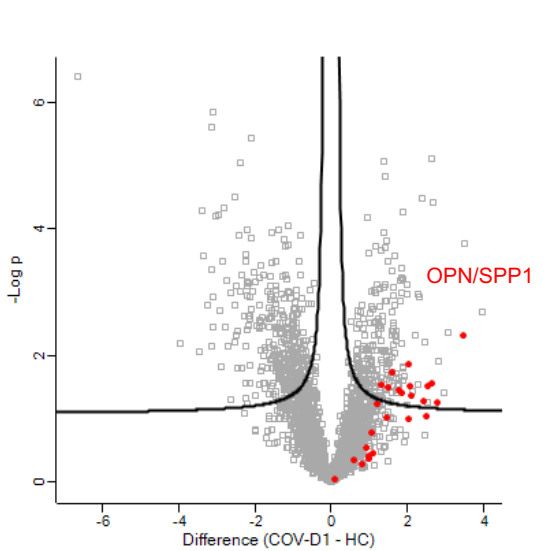

B

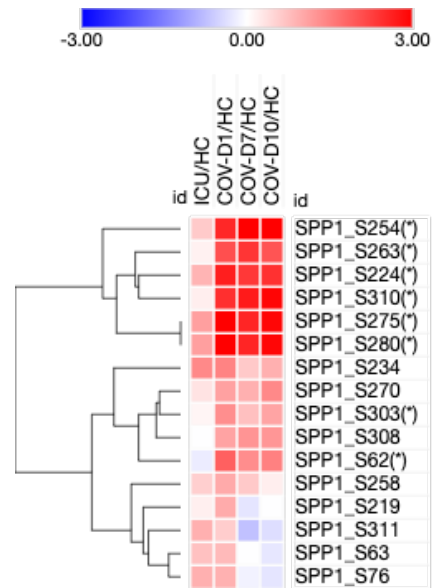

**Fig. S8. OPN/SPP1 phosphorylation is significantly upregulated in the COVID-19 PBMCs.**

(A) A volcano plot comparing the identified pSer/pThr sites between the COV-D1 and HC1 samples. The OPN/SPP1 phosphorylation sites are identified in red. (B) A heatmap showing the intensities of all SPP1 phosphosites in the patient PBMCs relative to the healthy control. The significant pSer sites are identified by asterisks.



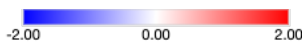

**Fig. S9. STAT1 regulated gene expression in the COV and ICU patients.** Log<sub>2</sub> fold change

in expression relative to the HC group is shown. The heatmap is generated color gradient from blue to red, representing decreased to increased (Log<sub>2</sub> fold change) expression.

Significantly regulated proteins are identified in asterisks with brief functional annotation on the right.

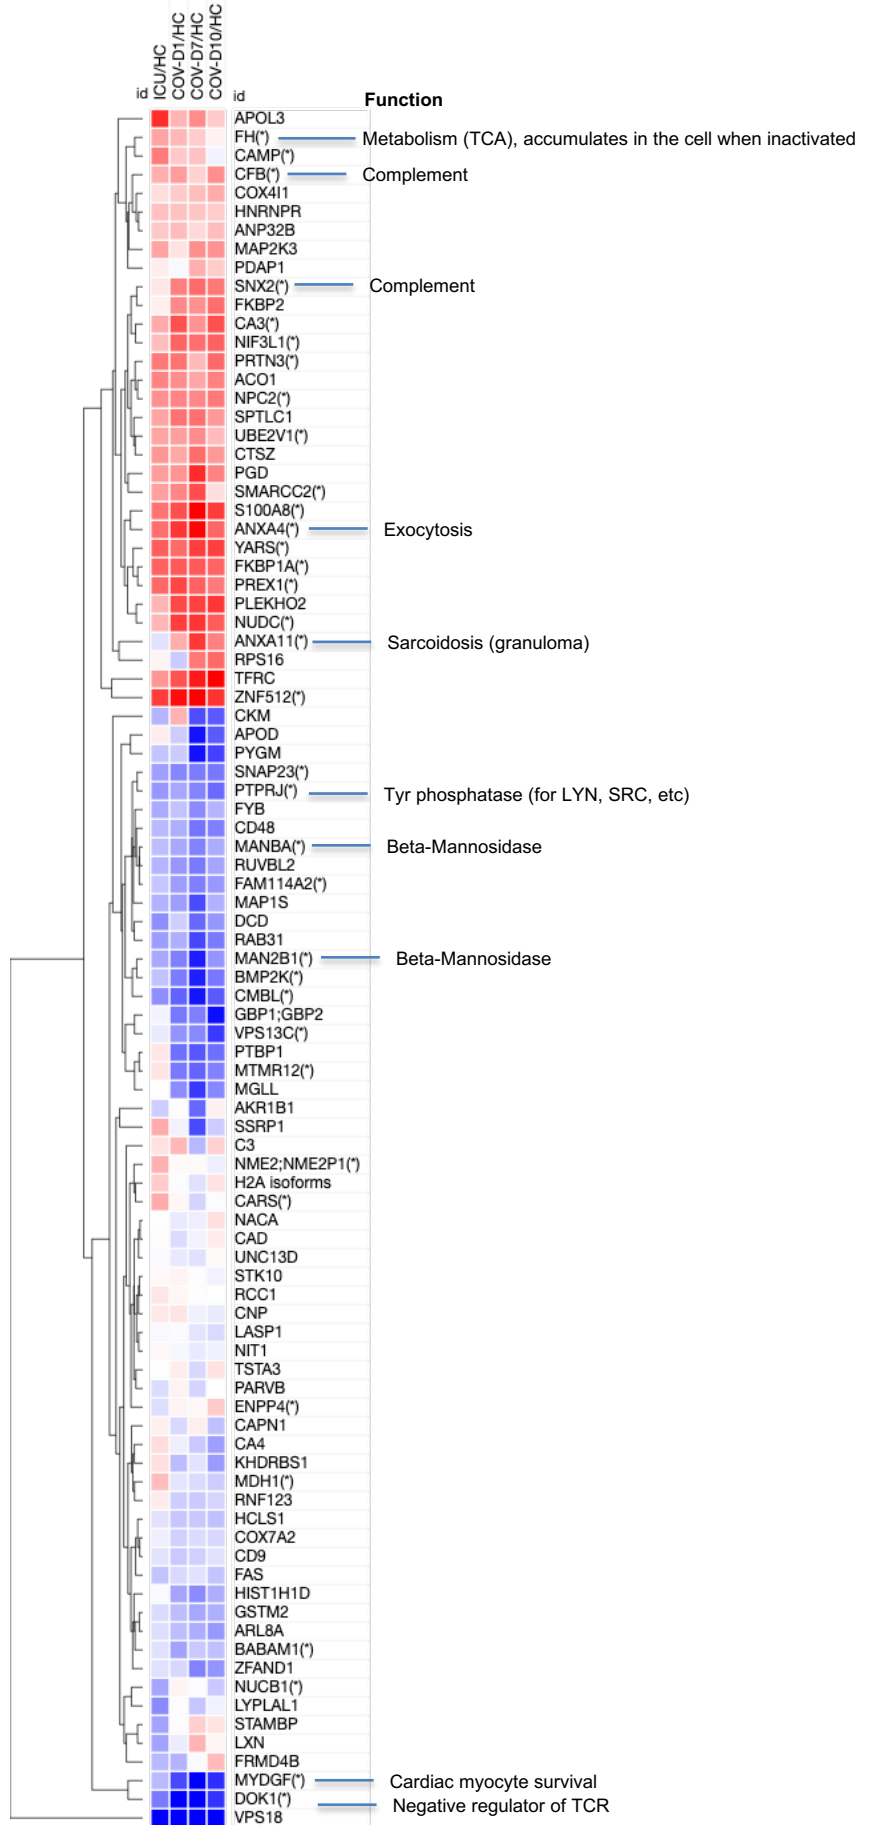

Recombinant SARS-CoV-2 Spike Protein (S-RBD)  
(residues 319-541)  
ThermoFisher RP-87678

Recombinant SARS-CoV-2 Nucleocapsid Protein  
(residues 1-419)  
RayBiotech 230-01104

S-RBD

N-FL

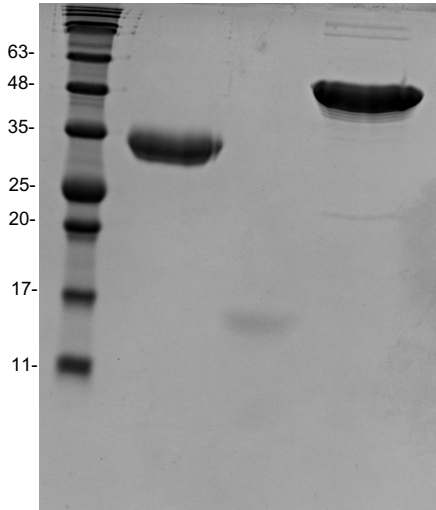

S-Ectodomain

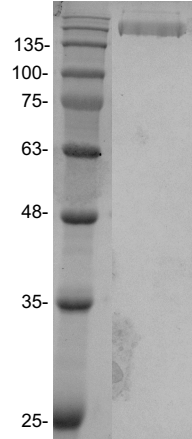

NSP3 NSP3  
N-RBD N-dimer unique ADRP NSP4 NSP9

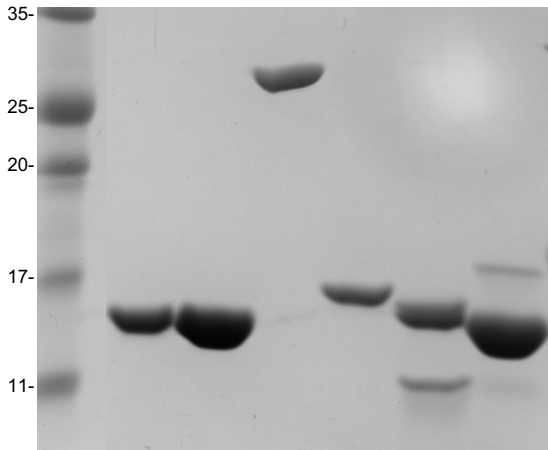

NSP3 NSP3  
NAB PLPro NSP5 NSP7 NSP8 NSP10 NSP16

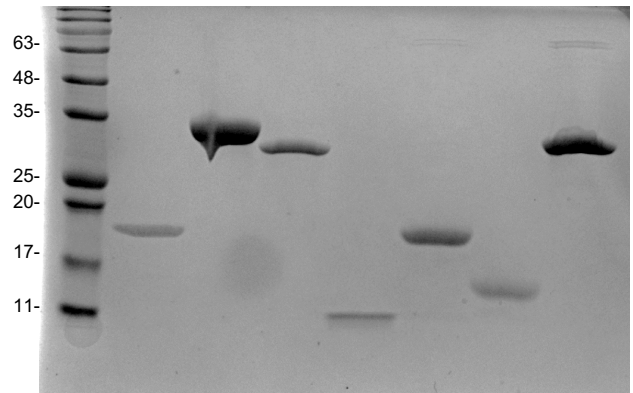

**Fig. S10. SDS PAGE images of the recombinant SARS-CoV-2 proteins used in the antigen array.**

A

|     |            |         |      |        |      |         |           |
|-----|------------|---------|------|--------|------|---------|-----------|
| IgG | PBS        | S-RBD   | PBS  | S-Ecto | PBS  | NSP3-u  | NSP3-ADRP |
| IgG | NSP3-PLPro | NSP3nab | NSP4 | NSP5   | NSP7 | NSP8    | NSP9      |
| IgG | NSP10      | NSP16   | PBS  | N-FL   | PBS  | N-Dimer | N-RBD     |

B

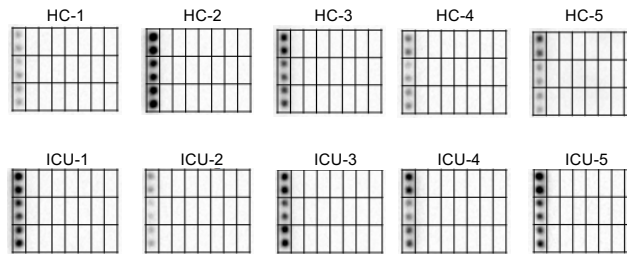

C

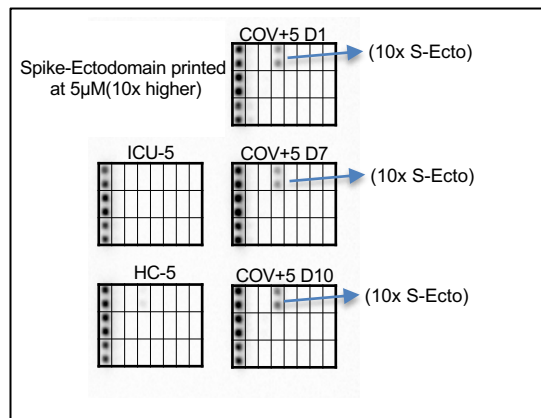

**Fig. S11. SARS-CoV-2 Proteome antigen array.** (A) Identity and position of proteins printed in the proteome array (see also Fig. 5). (B) The plasma from the ICU (COVID-19 negative) and healthy control group showed no antibody response to any virus antigen. (C) A proteome array printed with 10 x spike Ecto domain ( $5 \mu\text{M}$ ) was screened with the plasma samples from the COV+5 patient
